# Supplementary material for: Effect of Animal Age, Postmortem Calcium Chloride Marination, and Storage Time on Meat Quality Characteristics of M. longissimus thoracis et lumborum of Buffalo Bulls
Source: MDPI journal article supplement (doi:10.3390/foods11203193), 2022-10-13
Supplement: s1 [file s1]

**Supplementary Table S1.** Interaction effects of age groups, treatments and storage days on meat pH, color parameters (L\*, a\*, b\*, C\*, h\* and ΔE) of *M. longissimus thoracis et lumborum* of buffalo bulls.

|                               |                | pH   | L*    | a*    | b*    | C*    | h*    | ΔE   |
|-------------------------------|----------------|------|-------|-------|-------|-------|-------|------|
| Age groups x Treatments       |                |      |       |       |       |       |       |      |
| Young                         | Marinated      | 5.80 | 47.01 | 16.31 | 6.38  | 17.59 | 21.27 | 2.34 |
|                               | Non- Marinated | 5.75 | 45.98 | 16.51 | 6.11  | 17.57 | 20.13 | 2.58 |
| Spent                         | Marinated      | 5.60 | 46.54 | 15.82 | 8.03  | 17.93 | 26.84 | 2.73 |
|                               | Non- Marinated | 5.60 | 45.30 | 17.11 | 7.80  | 18.84 | 23.96 | 2.30 |
| SE*                           |                | 0.01 | 0.31  | 0.33  | 0.15  | 0.32  | 0.50  | 0.14 |
| Treatment x Days              |                |      |       |       |       |       |       |      |
| Marinated                     | Day 0          | 5.64 | 47.74 | 18.37 | 7.91  | 20.41 | 22.44 | 0.77 |
|                               | Day 2          | 5.60 | 47.55 | 15.45 | 7.11  | 17.25 | 24.95 | 2.99 |
|                               | Day 4          | 5.69 | 46.86 | 16.01 | 7.05  | 17.57 | 24.02 | 2.44 |
|                               | Day 6          | 5.72 | 46.94 | 15.77 | 7.17  | 17.46 | 24.66 | 2.65 |
|                               | Day 8          | 5.75 | 45.74 | 16.09 | 7.34  | 17.74 | 23.65 | 2.71 |
|                               | Day 10         | 5.81 | 45.83 | 14.71 | 6.63  | 16.14 | 24.62 | 3.99 |
| Non-Marinated                 | Day 0          | 5.60 | 46.58 | 18.44 | 6.91  | 19.49 | 19.50 | 0.77 |
|                               | Day 2          | 5.60 | 45.17 | 17.28 | 7.00  | 18.77 | 20.67 | 2.32 |
|                               | Day 4          | 5.66 | 45.77 | 17.24 | 7.15  | 18.69 | 22.12 | 1.83 |
|                               | Day 6          | 5.70 | 45.09 | 17.01 | 6.91  | 18.19 | 22.18 | 2.54 |
|                               | Day 8          | 5.72 | 45.45 | 16.33 | 6.92  | 17.85 | 22.83 | 2.73 |
|                               | Day 10         | 5.77 | 45.78 | 14.57 | 6.85  | 16.26 | 24.97 | 4.11 |
| SE*                           |                | 0.02 | 0.55  | 0.58  | 0.26  | 0.55  | 0.87  | 0.22 |
| Age groups x Treatment x Days |                |      |       |       |       |       |       |      |
| Young Marinated               | Day 0          | 5.70 | 47.72 | 15.16 | 5.44  | 16.37 | 19.58 | 3.83 |
|                               | Day 2          | 5.73 | 47.57 | 15.77 | 6.03  | 16.89 | 20.94 | 3.00 |
|                               | Day 4          | 5.83 | 46.84 | 16.71 | 6.52  | 18.00 | 21.27 | 1.94 |
|                               | Day 6          | 5.83 | 46.53 | 16.95 | 6.56  | 18.34 | 20.97 | 1.79 |
|                               | Day 8          | 5.82 | 46.76 | 17.21 | 7.21  | 18.67 | 22.77 | 1.27 |
|                               | Day 10         | 5.88 | 46.68 | 16.08 | 6.53  | 17.32 | 22.12 | 2.53 |
| Young Non-Marinated           | Day 0          | 5.70 | 46.43 | 15.00 | 4.72  | 15.63 | 17.02 | 4.39 |
|                               | Day 2          | 5.68 | 46.27 | 15.42 | 5.13  | 16.30 | 18.18 | 3.86 |
|                               | Day 4          | 5.78 | 46.52 | 16.94 | 6.41  | 18.14 | 20.64 | 1.88 |
|                               | Day 6          | 5.78 | 45.44 | 17.41 | 6.43  | 18.26 | 20.48 | 2.21 |
|                               | Day 8          | 5.75 | 45.33 | 17.98 | 7.20  | 19.37 | 21.80 | 1.89 |
|                               | Day 10         | 5.85 | 45.90 | 16.37 | 6.82  | 17.76 | 22.69 | 2.46 |
| Spent Marinated               | Day 0          | 5.58 | 47.78 | 21.58 | 10.40 | 24.46 | 25.31 | 4.41 |
|                               | Day 2          | 5.47 | 47.53 | 15.13 | 8.20  | 17.61 | 28.96 | 3.38 |
|                               | Day 4          | 5.55 | 46.89 | 15.32 | 7.59  | 17.15 | 26.78 | 3.09 |
|                               | Day 6          | 5.62 | 47.36 | 14.60 | 7.79  | 16.60 | 28.35 | 3.82 |
|                               | Day 8          | 5.68 | 44.73 | 14.97 | 7.48  | 16.82 | 24.54 | 4.20 |
|                               | Day 10         | 5.75 | 44.99 | 13.36 | 6.74  | 14.97 | 27.13 | 5.53 |
| Spent Non-Marinated           | Day 0          | 5.52 | 46.73 | 21.90 | 9.12  | 23.35 | 22.00 | 3.92 |
|                               | Day 2          | 5.52 | 44.08 | 19.16 | 8.88  | 21.24 | 23.16 | 3.50 |
|                               | Day 4          | 5.55 | 45.04 | 17.55 | 7.89  | 19.24 | 23.61 | 2.33 |
|                               | Day 6          | 5.63 | 44.75 | 16.62 | 7.41  | 18.12 | 23.90 | 2.99 |
|                               | Day 8          | 5.70 | 45.58 | 14.69 | 6.66  | 16.34 | 23.87 | 4.10 |
|                               | Day 10         | 5.70 | 45.68 | 12.79 | 6.89  | 14.77 | 27.27 | 5.82 |
| SE*                           |                | 0.03 | 0.77  | 0.81  | 0.36  | 0.79  | 1.24  | 0.21 |

Means in the same column with different small letters (a,b,c,d,e,f) are significantly different (p<0.05). \* SE: standard error.

**Supplementary Table S2.** Interaction effects of age groups, treatments and storage days on sensory attributes<sup>#</sup> (odor, flavor, texture and juiciness) of *M. longissimus thoracis et lumborum* of buffalo bulls.

|                   |        | Odor | Flavor | Texture | Juiciness |
|-------------------|--------|------|--------|---------|-----------|
| Age groups x Days |        |      |        |         |           |
| Young             | Day 2  | 5.88 | 5.93   | 5.75    | 5.75      |
|                   | Day 10 | 5.71 | 5.86   | 5.79    | 5.83      |
| Spent             | Day 2  | 6.31 | 6.21   | 5.66    | 5.56      |
|                   | Day 10 | 6.26 | 5.90   | 5.78    | 5.70      |
| SE                |        | 0.10 | 0.09   | 0.08    | 0.09      |

Means in the same column with different small letters (a,b,c) are significantly different ( $p < 0.05$ ). \* SE: standard error. # 1 = extremely non-beef-like odor, weak flavor, tough texture, dry in term of juiciness; 8 = extremely beef-like odor, strong flavor, tender texture, juicy.
